# Supplementary material for: The Oxford Renal (OxRen) cross-sectional study of chronic kidney disease in the UK
Source: PubMed Central journal article supplement — BMJ Open. 2013 Dec 17;3(12):e004265. doi: 10.1136/bmjopen-2013-004265 (PMC3884624; doi:10.1136/bmjopen-2013-004265), 2013-12-17
Supplement: bmjopen-2013-004265.draft_revisions.pdf [file bmjopen-2013-004265.draft_revisions.pdf]

**The Oxford Renal (OxRen) Cross-Sectional  
Study of Chronic Kidney Disease in the UK - A Protocol.**

|                                 |                                                                                                                                                                                                                                                                                                                                                                                                                                                                                                                                                                                                                                                                                                                                                                                                                                                                                                                                                                                                 |
|---------------------------------|-------------------------------------------------------------------------------------------------------------------------------------------------------------------------------------------------------------------------------------------------------------------------------------------------------------------------------------------------------------------------------------------------------------------------------------------------------------------------------------------------------------------------------------------------------------------------------------------------------------------------------------------------------------------------------------------------------------------------------------------------------------------------------------------------------------------------------------------------------------------------------------------------------------------------------------------------------------------------------------------------|
| Journal:                        | <i>BMJ Open</i>                                                                                                                                                                                                                                                                                                                                                                                                                                                                                                                                                                                                                                                                                                                                                                                                                                                                                                                                                                                 |
| Manuscript ID:                  | bmjopen-2013-004265                                                                                                                                                                                                                                                                                                                                                                                                                                                                                                                                                                                                                                                                                                                                                                                                                                                                                                                                                                             |
| Article Type:                   | Protocol                                                                                                                                                                                                                                                                                                                                                                                                                                                                                                                                                                                                                                                                                                                                                                                                                                                                                                                                                                                        |
| Date Submitted by the Author:   | 16-Oct-2013                                                                                                                                                                                                                                                                                                                                                                                                                                                                                                                                                                                                                                                                                                                                                                                                                                                                                                                                                                                     |
| Complete List of Authors:       | Hill, Nathan; University of Oxford, Department of Primary Care Health Sciences<br>Lasserson, Daniel; University of Oxford, Department of Primary Care Health Sciences<br>Fatoba, Samuel; University of Oxford, Department of Primary Care Health Sciences<br>O'Callaghan, Christopher; University of Oxford, Nuffield Department of Clinical Medicine; Oxford Radcliffe Hospitals Trust, John Radcliffe Hospital<br>Pugh, Chris; University of Oxford, Henry Wellcome Building for Molecular Physiology<br>Perera, Rafael; University of Oxford, Primary Health Care<br>Shine, Brian; , Oxford Radcliffe Hospitals NHS Trust, Clinical Biochemistry<br>John Radcliffe Hospital<br>Thompson, Ben; University of Oxford, Department of Primary Care Health Sciences<br>Wolstenholme, Jane; University of Oxford, Department of Public Health<br>McManus, Richard; University of Oxford, Dept of Primary Care Health Sciences<br>Hobbs, Richard; University of Oxford, Dept of Primary Health Care |
| <b>Primary Subject Heading</b>: | Epidemiology                                                                                                                                                                                                                                                                                                                                                                                                                                                                                                                                                                                                                                                                                                                                                                                                                                                                                                                                                                                    |
| Secondary Subject Heading:      | General practice / Family practice, Renal medicine                                                                                                                                                                                                                                                                                                                                                                                                                                                                                                                                                                                                                                                                                                                                                                                                                                                                                                                                              |
| Keywords:                       | NEPHROLOGY, HEALTH ECONOMICS, PRIMARY CARE                                                                                                                                                                                                                                                                                                                                                                                                                                                                                                                                                                                                                                                                                                                                                                                                                                                                                                                                                      |
|                                 |                                                                                                                                                                                                                                                                                                                                                                                                                                                                                                                                                                                                                                                                                                                                                                                                                                                                                                                                                                                                 |

SCHOLARONE™  
Manuscripts

**Title:** The Oxford Renal (OxRen) Cross-Sectional Study of Chronic Kidney Disease in the UK - A Protocol.

**Corresponding Author:** Professor Richard Hobbs

Department of Primary Care Health Sciences, Radcliffe Observatory Quarter  
Woodstock Road, Oxford, OX2 6GG

**Authors:** Dr Nathan R Hill<sup>1</sup> – Nathan.Hill@phc.ox.ac.uk  
Dr Daniel Lasserson<sup>1</sup> – Daniel.Lasserson@phc.ox.ac.uk  
Dr Samuel Fatoba<sup>1</sup> – Samuel.Fatoba@phc.ox.ac.uk  
Professor Chris A. O'Callaghan<sup>2</sup> – chris.ocallaghan@ndm.ox.ac.uk  
Professor Chris Pugh<sup>2</sup> – cpugh@well.ox.ac.uk  
Dr Rafael Perera-Salazar<sup>1</sup> – Rafael.Perera@phc.ox.ac.uk  
Dr Brian Shine<sup>3</sup> – Brian.Shine@ouh.nhs.uk  
Dr Ben Thompson<sup>1</sup> – Ben.Thompson@phc.ox.ac.uk  
Dr Jane Wolstenholme<sup>4</sup> – Jane.Wolstenholme@dph.ox.ac.uk  
Professor Richard McManus<sup>1</sup> – Richard.McManus@phc.ox.ac.uk  
Professor FD Richard Hobbs<sup>1</sup> – Richard.Hobbs@phc.ox.ac.uk

1 Department of Primary Care Health Sciences, Radcliffe Observatory Quarter  
Woodstock Road, Oxford, OX2 6GG

2 Henry Wellcome Building for Molecular Physiology, Nuffield Department of Clinical  
Medicine, Churchill Hospital, Oxford, OX3 7BN

3 Clinical Biochemistry, Oxford Radcliffe Hospitals NHS Trust, John Radcliffe Hospital,  
Oxford, OX3 9DU

4 Department of Public Health, University of Oxford, Old Road Campus, Headington,  
Oxford, OX3 7LF

**Keywords**

Chronic Kidney Disease (CKD), CKD Screening, UK CKD Prevalence, CKD  
Prevalence, eGFR Screening

**Word count:** 4,534

## Abstract

### Introduction

Chronic Kidney Disease(CKD) diagnosed with objective measures of kidney damage and function has been recognised as a major public health burden. Independent of age, sex, ethnicity, and comorbidity, strong associations exist between cardiovascular disease, mortality, morbidity and CKD, defined by reduced glomerular filtration rate and increased urinary albumin excretion. Detection of CKD within the population is therefore a priority for health systems.

### Methods and Analysis

Fifteen thousand patients aged 60 years or over meeting the inclusion criteria will be invited to the study. Recruitment will be stratified to represent the distribution of socio-economic position in the UK general population. Patients will be excluded if terminally ill (expected survival <1 year), or if they have received a solid organ transplant.

Patients will attend up to two screening visits, to determine if they have CKD, followed by an assessment visit where demographic and physiological parameters will be recorded alongside questionnaires on exercise, diet, cognitive assessment and quality of life. Blood and urine specimens will be taken for immediate routine assays as well as for freezing pending peptide and genetic studies. Patients will have office and home BP measurements as well as pulse wave velocity assessment. Healthcare costs of screening and subsequent monitoring will be calculated.

### Ethics and Dissemination

The protocol and related documents have been approved NRES Committee South Central - Oxford B – Reference 13/SC/0020.

Findings will be presented to a primary care audience (at scientific meetings of the Society for Academic Primary Care) and a renal audience (at the Renal Association). Authorship will be determined in accordance with the ICMJE guidelines and other contributors will be acknowledged. The findings of the study will be submitted for publication in an appropriate peer-review medical journal. We would seek to publish in open access journals to encourage the dissemination of the information.

## INTRODUCTION

Chronic Kidney Disease (CKD) is a worldwide health problem associated with high morbidity and mortality [1 2] and its prevalence is increasing [3]. Decreased renal function is a well known predictor of hospitalisation [4], cognitive dysfunction [5] and reduced quality of life [6 7]. Cardiovascular disease (CVD) is the primary cause of morbidity and mortality in this population where CKD is regarded as both an accelerator of CVD risk and an independent risk factor for CVD events [4]. Even the earliest stages of CKD are known to be associated with significantly increased risks of cardiovascular morbidity, premature mortality, and decreased quality of life [1 4 8]. While the CVD risk in end stage renal failure is high, the healthcare burden resides in early stages of disease as it is more prevalent, affecting around 35% of those over 70 years [9].

Interventions for patients with CKD can delay progression, decrease morbidity [10] and decrease mortality rates [11]. Antihypertensive medications blocking the renin-angiotensin-aldosterone system (RAAS) - such as angiotensin-converting enzyme (ACE) inhibitors and/or angiotensin receptor blockers - have been systematically proven to be of benefit to patients with proteinuric CKD [12]. A recent systematic review by Sharma reported a statistically significant reduction in the risk of doubling of creatinine levels (in people with stage 3 CKD stratified by baseline 24-hour urinary protein) in those with  $\geq 3$  g/L of proteinuria (66%, 95% CI 34 to 82). Numerous other studies examining the role of interventions have also been shown to be effective in CKD to delay progression and/or improve mortality rates, including statin therapy [13], blood pressure lowering [14 15], control of metabolic bone disease [16] and lifestyle changes in diet [17] and physical activity [18].

Early stages of CKD are defined on the combination of kidney damage (quantified with evidence of renal damage - imaging or proteinuria) and decreased kidney function (defined as glomerular filtration rate [GFR] estimated from serum creatinine concentration). The National Institute for Clinical Excellence (NICE) [19] recommends using urine creatinine concentration for estimation of GFR using the Modification of Diet in Renal Disease study (MDRD) four variable equation [20]. NICE highlight the need for strategies aimed at earlier identification and (where possible) prevention of progression to established renal failure [19]. Since CKD is usually asymptomatic until later stages of the disease (Stage 4+), it may be beneficial to establish efficient detection mechanisms for patients with early-stage CKD [21].

1  
2  
3  
4 Screening enables early detection, but mass screening of all age groups for kidney  
5 disease is expensive, low yield, and not cost-effective [22]. There is an age related  
6 decline in renal function, and it has been shown in contemporary UK data sources [9  
7 23] - including retrospective laboratory data, audit studies and GP record systems -  
8 that from age 60 years, CKD prevalence increases rapidly. It may, therefore, be  
9 reasonable to screen systematically in this age group.  
10  
11

12  
13  
14 **Aims:** The primary aim is to establish the number of previously undetected cases of  
15 CKD. They will be detected by screening of a blood test for the estimation of  
16 glomerular filtration rate (eGFR) and a quantification of urinary protein.  
17

18 The secondary aims are to 1) determine the cost-effectiveness of screening for CKD;  
19 2) determine the prevalence of selected risk factors and levels of distribution of  
20 estimated kidney function in screen-detected patients.  
21  
22

## 23 24 25 **METHODS AND ANALYSIS**

### 26 27 **Study design**

28 This cross-sectional screening study is part of the Oxford Renal Study (OxRen),  
29 recruiting from a population of patients aged 60 years and older who are registered  
30 at GP surgeries within the Thames Valley region. OxRen consists of a further study  
31 that will longitudinally follow up patients who are diagnosed with CKD through this  
32 screening study and elsewhere.  
33  
34  
35

36  
37 The Thames Valley has 278 practices and supports a population of approximately  
38 2.3 million. OxRen consists of a co-ordinating centre, the NIHR School for Primary  
39 Care Research (SPCR) Oxford and a minimum of eleven GP surgeries (covering a  
40 population of approximately 60,000 patients) from which patients are recruited. There  
41 will be up to three additional practices that will serve as a control group for the cost-  
42 effectiveness analysis.  
43  
44  
45

### 46 47 48 **Inclusion criteria**

- 49 • Participant is willing and able to give informed consent for participation in the  
50 study.  
51
  - 52 • Male or Female, aged 60 years or above.  
53
  - 54 • No blood test within last 12 months.  
55
- 56  
57  
58  
59  
60

### **Exclusion criteria**

In order to be as inclusive as possible there are a minimal number of exclusion criteria:

- Not previously diagnosed with CKD (either coded by their GP or someone else and any recorded eGFR  $> 90$  mL/min/1.73m<sup>2</sup> within the last 12 months or other renal disease
- Terminally ill (expected survival  $<1$  year)
- Previous solid organ transplant
- Patients whom the GP feel are inappropriate for the study

### **Recruitment Process**

Patients will be identified by staff, at GP surgeries, who will review electronic patient records and select patients who fulfil the study criteria.

A spread of practices representative of the UK general population will be achieved by stratifying practices into national quartiles of deprivation, taking into account practice size and, selecting practices that agree to take part sequentially until each quartile practice target is reached. Over the course of recruitment the sequential practice selection strategy will be examined to ensure practices serving high proportions of ethnic minorities are included in the final places if this has not already occurred in earlier recruitment.

### **Study Patients**

Fifteen thousand patients (15,000) aged over 60 years old from primary care will be invited by letter to be part of the study. The letter will include the study patient information sheet. Patients will be given a contact number and email address of the study team who will be able to answer any questions they might have.

The patients' first visits will depend on any previous record of impaired renal function as defined by an abnormal eGFR (eGFR  $\geq 60$  mL/min/1.73m<sup>2</sup> and albumin to creatinine ratio (ACR)  $\geq 30$  mg/g or eGFR  $<59$  mL/min/1.73m<sup>2</sup> regardless of ACR):

No prior record of abnormal eGFR: Patients with no prior record of impaired renal function will attend the first screening visit (Visit 1) for a blood test to determine eGFR. If at this visit they are deemed to have impaired renal function they will then proceed to a second screening visit (Visit 2) after a 3-month interval to have their

1  
2  
3 CKD diagnosis confirmed. The results must be at least 3 months apart and within the  
4 last 12 months to be in line with NICE guidance.  
5  
6  
7

8 Participants within 5 mL/min/1.73m<sup>2</sup> of the upper limit eGFR range of Stage 3a CKD  
9 (i.e. between 60 and 65 mL/min/1.73m<sup>2</sup>) will be invited to the second screening visit  
10 (Visit 2). This is to ensure the intra-individual variation in eGFR does not lead to a  
11 false negative classification of disease. Patients will also undergo a urinary ACR.  
12  
13

14  
15 One positive result for CKD: Patients with a previously recorded single result for  
16 impaired renal function (within the last 12 months), defined by an abnormal eGFR  
17 and/or urinary protein will have CKD status determined with a confirmatory blood test  
18 for calculation of eGFR as well as urinary ACR. If CKD is diagnosed then they will  
19 then attend the baseline assessment (Visit 3).  
20  
21  
22

23  
24 All patients diagnosed with CKD through at least two abnormal eGFRs and/or ACRs  
25 will attend the baseline assessment visit (visit 3). If a patient's eGFR and/or ACR  
26 tests are abnormal at visit 1 and normal at visit 2 they will be defined as having  
27 transient CKD and will proceed to the baseline assessment visit (visit 3). All other  
28 patients will not attend the baseline assessment visit.  
29  
30  
31

### 32 33 **CKD Definition**

34 CKD diagnoses will be established through eGFR and evidence of renal damage  
35 (proteinuria - ACR) to define the early stages. The eGFR will be estimated using the  
36 MDRD equation using an IDMS compatible creatinine assay as recommended by  
37 NICE. The CKD-EPI equation for estimation of eGFR will also be used as a method  
38 to determine if there is any difference in CKD categorisation as the MDRD may  
39 underestimate the actual GFR in healthy patients by up to 29% [24]. Albuminuria is  
40 defined using ACR with micro-albuminuria being an ACR of 3.4 mg/mmol (30 mg/g)  
41 to 33.9 mg/mmol (299 mg/g). Sex specific cut offs for ACR will also be used [25]:  
42 micro-albuminuria (1.9 mg/mmol (≥17 µg/mg) in men and 2.8 mg/mmol (≥25 µg/mg)  
43 in women). Macro-albuminuria will be defined as an ACR ≥34 mg/ mmol (300 mg/g).  
44 Stages of CKD will be defined in line with NICE guidelines as shown in Table 1.  
45  
46  
47  
48  
49  
50  
51  
52  
53  
54  
55  
56  
57  
58  
59  
60

| CKD Stage | eGFR<br>(mL/min/1.73m <sup>2</sup> ) | ACR<br>(mg/g) |
|-----------|--------------------------------------|---------------|
| Stage 1   | ≥ 90                                 | ≥30           |
| Stage 2   | 60-89                                | ≥30           |
| Stage 3a  | 45–59                                | -             |
| Stage 3b  | 30-44                                | -             |
| Stage 4   | 15-29                                | -             |
| Stage 5   | <15                                  | -             |

Table 1 – CKD stages defined by estimated Glomerular Filtration Rate(eGFR) and Albumin Creatinine Ratio(ACR)

### Outcome Measures

Primary outcome: The proportion of patients diagnosed with CKD from a primary care population of patients aged 60 years+ demographically representative of the UK general population.

Secondary outcome: 1) The cost and cost effectiveness of screening for CKD in the 60+ age group 2) The prevalence of selected risk factors and the distribution of eGFRs within that group.

### Study Procedures

Patient visits are at their own GP practice. Practices will be trained in study procedures including obtaining informed consent. The study will be carried out in accordance with the Declaration of Helsinki and OxRen has been approved by Ethics Committee South Central Oxford REC B - 13/SC/0020. An algorithm, that specifies what nephrology advice is given should a patient be diagnosed with CKD, will be provided to GPs. Patients who are identified for the first time as having advanced CKD (eGFR <30 mL /1.73 m<sup>2</sup>, Stage 4+) will be referred to a specialist renal clinic.

### Screening Visit (Visit 1)

The study will be explained to potential participants and they have the opportunity to ask questions about the study. Consent will be sought and potential participants have as much time as required to decide if they wish to participate. If they consent,

1  
2  
3 patients will then have a blood test for calculation of kidney function using the MDRD  
4 eGFR and urinary assessment for ACR.  
5  
6  
7

8 Patients who test positive will proceed to Visit 2 - as will patients within 5  
9 mL/min/1.73m<sup>2</sup> of the upper limit eGFR range of Stage 3a CKD (i.e. between 60 and  
10 65 mL/min/1.73m<sup>2</sup>). Patients who test negative will not proceed.  
11  
12

### 13 14 **Screening Visit (Visit 2)**

15 Patients with a single eGFR and/or ACR in the range for a CKD diagnosis will have a  
16 second confirmatory blood test for kidney function performed at this visit. If after this  
17 visit the patient has two abnormal results for impaired renal function they will be  
18 classified as being diagnosed with CKD and invited to attend the baseline  
19 assessment (Visit 3). Patients with an eGFR >60 ml/min/1.73m<sup>2</sup> but persistent  
20 proteinuria as evidenced by a raised ACR at Visit 2 will also be diagnosed and  
21 invited to attend baseline assessment.  
22  
23  
24  
25  
26  
27

28 If on the second occasion the patient's blood results do not fall within the criteria for  
29 CKD diagnosis then the patients will still be invited to the assessment baseline visit  
30 (visit 3) but classified as having "transient CKD" and will proceed to the next visit  
31 (Visit 3 – Baseline Assessment).  
32  
33  
34

### 35 36 **Baseline Assessment visit (Visit 3)**

37 The baseline assessment visit will occur after the screening visits (Visits 1 and 2).  
38 Patients have full demographic details recorded including age, self-assigned  
39 ethnicity, educational status, residential postcode, clinical history, past medical  
40 history, family history, smoking and alcohol use, major co-morbidities, current  
41 medication, physical examination (weight, height, and waist circumference using a  
42 validated method) and BP measurement using a validated automated device.  
43 Patients will have a 12 lead electrocardiograph (ECG).  
44  
45  
46  
47  
48

49 Blood specimens will be obtained for creatinine and electrolytes, blood glucose,  
50 hepatic and bone profiles, HbA1c, lipids (total cholesterol, LDL, HDL), urate, B type  
51 natriuretic peptide (BNP), Cystatin C, full blood count and a random spot urine  
52 sample for the calculation of the albumin to creatinine ratio (ACR). Serum creatinine  
53 will be measured by automatic analyser (using the Jaffe method calibrated to IDMS  
54 values). Five sample bottles (20 ml/s in total) will be required to collect the blood  
55  
56  
57  
58  
59  
60

1  
2  
3 specimens for analysis by the biochemistry laboratory. One 20 ml sample bottle will  
4 be required for the collection of urine. All samples will be sent to the laboratory from  
5 the GP practices in the routine way.  
6  
7

8  
9  
10 Additional samples (5 bottles, 25 mls) will be collected and stored at -80°C for future  
11 genetic and protein testing. One additional 20 ml sample bottle for the collection of  
12 urine will be collected. All samples will be sent to the lab with the blood specimens  
13 for the routine haematology and biochemistry. Once at the laboratory they will be  
14 prepared and sent on to the bio-bank.  
15  
16

17  
18  
19 Patients will be given questionnaires to be completed at visit 3. taking approximately  
20 50 minutes to complete:

- 21 • Quality of life – Assessed using the EQ-5D-5L questionnaire - 6 items taking  
22 approximately 5 minutes to complete.
- 23 • Dietary assessment – Assessed using the Million Woman Study Diet (MWS-  
24 D) Questionnaire – 9 items taking approximately 15 minutes to complete.
- 25 • Physical activity – Assessed using the International Physical Activity  
26 Questionnaire: Short version (iPAQ-Short) - 7 items taking approximately 10  
27 minutes to complete.
- 28 • Cognitive function – Assessed using the Montreal Cognitive Assessment  
29 questionnaire (MoCA) - 8 tasks requiring approximately 20 minutes to  
30 complete.  
31  
32  
33  
34  
35  
36  
37

38  
39 Patients are provided with a BP monitor suitable for home use and asked to  
40 document their blood pressure 3 times daily over a typical week and to return it. We  
41 also seek to provide patients with a 24h blood pressure monitor. The device will be  
42 provided following the baseline visit for use on one day in a typical week and will then  
43 be returned. Further BP information will be collected using a Pulse Wave Analysis  
44 (PWA) machine that will be used on patients at their clinic visits.  
45  
46  
47

48  
49 Hypertension will be defined as a clinic measurement of systolic BP of 140 mmHg or  
50 greater, diastolic BP of 90 mmHg or greater confirmed with ambulatory blood  
51 pressure monitoring [26] or use of antihypertensive medications irrespective of BP.  
52 Diabetes mellitus will be defined as an HbA1c of 48 mmol/mol (6.5%) or greater or  
53 use of hypoglycemic agents [27]. A history of cardiovascular disease is defined as a  
54 history of coronary arterial disease, cerebrovascular disease or peripheral arterial  
55  
56  
57  
58  
59  
60

1  
2  
3 disease. Body mass index (BMI) will be calculated based on weight and height  
4 (weight [kg]/height [m<sup>2</sup>]). Any new diagnosis of disease will be followed up with the  
5 patients GP informing them of the NICE guidelines in the relevant area.  
6  
7  
8  
9  
10  
11  
12  
13  
14  
15  
16  
17  
18  
19  
20  
21  
22  
23  
24  
25  
26  
27  
28  
29  
30  
31  
32  
33  
34  
35  
36  
37  
38  
39  
40  
41  
42  
43  
44  
45  
46  
47  
48  
49  
50  
51  
52  
53  
54  
55  
56  
57  
58  
59  
60

For peer review only

### **Procedures**

Oxford University Hospitals NHS Trust Clinical Biochemistry laboratories will perform all the tests using standardised methods that are periodically recalibrated against reference samples.

### **Number of Patients**

Fifteen thousand patients will be invited to the study. We estimate a recruitment rate of 40% per practice giving a cohort of 6000 patients. We require a total practice population of 82,500 (or about 11 GP surgeries) determined from an average practice size with a patient list of 7500. This is based on data from the Oxford Vascular Study of 4627 people (Jan 2012) within Oxfordshire, that detailed the percentage of an average practice list that is over 60 is 21% [28].

### **Analyses**

To estimate the benefits of screening for the diagnosis of CKD using a blood test for the estimation of glomerular filtration rate (eGFR), we have based the calculation on the cohort of 6000 patients. Prevalence estimates for CKD vary between 20% [23] and 28% [9] for patients who are  $\geq 60$  years old. Using a sample size of 6000 and a 20% and 28%, as lower and upper limits for the estimated prevalence, then this number of patients with CKD will yield a precision (defined as the total length of the 95%CI) of between 1% and 1.1% around the prevalence estimate.

Descriptive analyses will be used to characterise the participant population by sociodemographic data, health status, and lifestyle factors. Prevalence and mean values of CKD stages and selected conditions (diabetes, hypertension, etc.) by sex, age, and race/ethnicity will be examined using chi-square statistics for categorical variables and Wilcoxon's rank sum for continuous values. We will carry out univariate analyses to explore associations between different patient characteristics and eGFR levels as a continuous variable at baseline and we will explore multivariate models that will include these characteristics such as: age, gender, and the other factors we measure during the baseline assessment.

### **Economic Analysis**

The health economic analysis will consider three questions:

- What is the cost to the NHS of screening for CKD, in terms of the cost of the screen and subsequent health care costs related to treating and managing the disease?
- How cost-effective is systematic screen-detection compared with current detection of CKD via the provision of routine care, in terms of cost per additional case detected?
- What is the long-term cost-effectiveness of screen detection/active case finding in terms of cost per additional quality adjusted life (QALY) year gained?

For the purpose of the economic analysis, the cohort of individuals invited to be screened will need to be compared with a control cohort with no screening. It is proposed that up to 3 practices will be recruited to act as a control group. The economic evaluation will be split into two components. The cost per case detected will be estimated using data collected from individuals in the cohort. The long-term cost-effectiveness of screening/case-finding will be determined by developing a life-time disease model for CKD.

### **Data collection**

*Resource use and costs:* The cost analysis will adopt an NHS perspective.

*Screening/case finding cost:* The cost of screening/case finding will be determined using data from the invited cohort of individuals. Resource use and unit costs will be collected in relation to the identification of the cohort through routine clinical records, the invitation and diagnostic tests performed.

Cost related to follow-up health care: Data on health care resource use will be collected from all individuals in the 'invited to-screen' and 'no screen' cohorts, including all relevant hospital and GP consultations, medications, referrals, tests and equipment. Where possible, data on resource utilisation will be collected from electronic patient records. One-third of the records for this cohort will be amenable to this form of data collection. For the remainder of the cohort we will set up an electronic data-capture for a number of pre-determined health-care resource-use events which are likely to represent key cost-drivers, such as medications and hospitalisations.

1  
2  
3  
4  
5  
6  
7  
8  
9  
10  
11  
12  
13  
14  
15  
16  
17  
18  
19  
20  
21  
22  
23  
24  
25  
26  
27  
28  
29  
30  
31  
32  
33  
34  
35  
36  
37  
38  
39  
40  
41  
42  
43  
44  
45  
46  
47  
48  
49  
50  
51  
52  
53  
54  
55  
56  
57  
58  
59  
60

Where possible, we will value our items of health care resource utilisation using appropriate unit costs (staff costs, equipment, drug costs etc.) obtained from published sources, including the most recent version of Unit Costs of Health and Social Care and NHS Reference Costs. We will estimate unit costs that are not available from secondary sources using the approach used in the most recent version of Unit Costs of Health and Social Care.

*Outcomes/utility data:* The outcome of interest for the purpose of the economic evaluation will be number of CKD cases detected/diagnosed. This will be obtained directly from the screen-detected cohort and compared with the numbers arising in the 'no-screen' control group.

NICE recommends the use of preference-based health-related quality of life (HRQL) measures for the purpose of determining Quality Adjusted Life Years (QALYs) for economic evaluation. The use of quality-adjusted life years aims to capture the impact of disease progression and non-fatal events on quality of life in addition to any impact on survival. The EQ-5D (Available in Appendix C) will be used to measure patient health-related QoL across 5-dimensions, mobility, self-care, usual activities, pain/discomfort, anxiety and depression. It will be collected from the cohort at baseline and at their annual follow-up contact. EQ-5D scores at each time point will be converted into a utility score on a 0 to 1 scale where 0 is equivalent to dead, and 1, to perfect health. This conversion will be made using the new algorithm based on the UK value set currently being conducted by the EuroQol Group, if available at the time of analysis. If not available, the current crosswalk algorithm provided by the EuroQol group and algorithm estimated by Dolan et al. derived from a survey of the UK population (n=3337), will be used. Utility values in the tariff set range from no problems on any of the five dimensions in the EQ-5D descriptive system (value=1.0) to severe or extreme problems across all five dimensions (value=-0.594) [29 30]. The utility scores will be combined with survival data to estimate the quality adjusted life-years (QALY's) required for the cost-utility analysis. This utility data will be used for the purpose of modelling the cost per QALY of screening for CKD.

### **Analysis**

*Missing data:* The resource-use/cost and EQ-5D data will be investigated to ascertain the extent of missing data and whether this is due to random missingness

1  
2  
3 and/or censoring. Standard methods will be used to handle any relevant missing data  
4 [31 32].  
5  
6  
7

8 *Cost Analysis:* The focus of studying the healthcare resource use is to investigate  
9 how screening for CKD affects the health care costs of treating and managing the  
10 disease. With the aim of the economic analysis to estimate how the costs of the  
11 'screen/case-finding' minus the difference in health care costs between the screen-  
12 detected and routinely diagnosed group of patients balances against the health care  
13 benefits. A three-stage analysis of the healthcare resource use and their costs will be  
14 conducted. First, the cost associated with the case-finding/screen will be estimated  
15 using the resource-use related to the identification of the cohort through routine  
16 clinical records, the invitation and diagnostic tests performed (including staff time,  
17 equipment, tests and consumables). Second, the impact of the screen-detection on  
18 (1) all healthcare resource use/costs, (2) kidney disease specific healthcare resource  
19 use/costs, and (3) CVD related healthcare resources costs will be evaluated over the  
20 duration of the study (3 years). Third, a regression framework that relates healthcare  
21 costs to baseline characteristics age, gender, kidney disease stage, progression,  
22 other co-morbidities and CVD will be developed. The objective being to provide  
23 estimates of healthcare costs for different kidney disease stages and CVD events to  
24 inform the extrapolation model (see below). A similar regression framework approach  
25 will be used for the EQ-5D tariff data at the different data collection time-points, again  
26 to inform the extrapolation model.  
27  
28  
29  
30  
31  
32  
33  
34  
35  
36  
37

38 *Cost per-CKD case detected:* The incremental cost-effectiveness of screening  
39 compared to routine diagnosis of CKD will be determined using the cost analysis  
40 data (described above); cost of screening plus its cost impact on treating and  
41 managing CKD in the 'screen-detected' cohort will be compared with health care  
42 costs related to CKD in the routine diagnosis cohort. This incremental cost will be  
43 weighed up against the incremental benefit in terms of the incremental CKD cases  
44 detected by screening compared to routine diagnosis over the initial two-year period  
45 that the entire screened cohort will run. Discounting at a rate of 3.5% will be applied.  
46 By using data from the cohort that uses Thames Valley practices only, there may be  
47 limits to the generalisability of the results of the study. This will be explored within the  
48 economic evaluation using extensive sensitivity analysis. Key parameters will be  
49 varied to determine the impact of changes on results. Case finding in different patient  
50 sub-groups will also be considered. Non-parametric bootstrapping and probabilistic  
51  
52  
53  
54  
55  
56  
57  
58  
59  
60

1  
2  
3 sensitivity analysis will be undertaken to explore uncertainty in the confidence to be  
4 placed on the results of the economic analysis and cost effectiveness acceptability  
5 curves will be presented.  
6  
7

8  
9  
10 *Cost per QALY of screen-detection in CKD:* Building on the results of the cohort-  
11 based economic evaluation (incremental cost-per-case detected), a model-based  
12 analysis will be conducted to estimate the cost per QALY of screening for CKD. The  
13 methods used will depend on the available cohort data, but will either use parametric  
14 methods as set out by the NICE Decision Support Unit [33] or use a lifetime decision-  
15 model (developing a Markov model similar to that used by Manns and colleagues  
16 [33] or adapting available CKD models. This will be based on the individual patient  
17 data (using the results from the regression analyses outlined above) from the study  
18 and external data (where required). It will be carried out from an NHS and Personal  
19 Social Services perspective, to take into account health care costs and longer term  
20 social care costs of cardiovascular events and the impact on life expectancy, quality  
21 adjusted life expectancy. The model will be run over remaining patient lifetime, with  
22 costs and benefits discounted at a rate of 3.5%. The lifetime cost-effectiveness  
23 analysis will be driven by the decision analytic model and the way treatment effects  
24 are propagated in the model. Extensive deterministic sensitivity analysis will be  
25 undertaken to assess the impact of changing the values of key parameters and will  
26 be used to explore the importance of modelling assumptions. Probabilistic sensitivity  
27 analyses will be conducted to deal with uncertainty in model parameters and cost-  
28 acceptability curves will be presented.  
29  
30  
31  
32  
33  
34  
35  
36  
37  
38  
39

## 40 **ETHICS AND DISSEMINATION**

### 41 **Ethics**

42 The Chief Investigator will ensure that this study is conducted in accordance with the  
43 principles of the Declaration of Helsinki and ensure this study is conducted in full  
44 conformity with relevant regulations and with the ICH Guidelines for Good Clinical  
45 Practice (CPMP/ICH/135/95) July 1996. Site staff will be fully trained in Good Clinical  
46 Practice (GCP) as appropriate to their study role.  
47  
48  
49  
50  
51  
52  
53  
54  
55  
56  
57  
58  
59  
60

1  
2  
3 The protocol and related documents have been approved by an appropriate  
4 Research Ethics Committee (NRES Committee South Central - Oxford B –  
5 Reference 13/SC/0020). The Chief Investigator will submit and, where necessary,  
6 obtain approval for all substantial amendments to the original approved documents.  
7  
8  
9

10  
11 Ensuring patient confidentiality is an established and robust process within the  
12 Primary Care Clinical Trials Unit (PC-CTU) where the study data will be run. All staff  
13 adhere to the principles of GCP and the Data Protection Act, 1998. It is the PC-  
14 CTU's preferred procedure that patients will only be identified on study documents by  
15 use of a unique screening id and, if diagnosed with CKD, a unique participant ID,  
16 which cannot be used to identify individual participants. All study documents such as  
17 case report forms holding patient information are held securely with restricted access  
18 either electronically or in paper format.  
19  
20  
21  
22  
23

24  
25 The holding of patient identifiable information will be kept separate from the  
26 information collected on the patient and will be used only to follow-up the patient. For  
27 example if a member of the research team needs to make a follow up phone call to a  
28 patient or recall them for their annual follow-up visit. Case report forms and all other  
29 documents holding identifiers are anonymised as soon as possible with the process  
30 of management being outlined in detail within the ethics application and in study  
31 specific procedures.  
32  
33  
34  
35  
36

### 37 **Dissemination**

38  
39 The Investigators will be involved in reviewing drafts of the manuscripts, abstracts,  
40 press releases and any other publications arising from the study. Authors will  
41 acknowledge that the National Institute for Health Research Biomedical Research  
42 Centre (NIHR BRC) and the NIHR School of Primary Care Research funded the  
43 study. Authorship will be determined in accordance with the ICMJE guidelines and  
44 other contributors will be acknowledged.  
45  
46  
47  
48

49  
50 The results of this study will be of relevance to the renal research community and the  
51 primary care research community. We would present our findings to both a primary  
52 care audience (e.g. at scientific meetings of the Society for Academic Primary Care  
53 and the Confederation of Primary Care Research Organisations) and a renal  
54 audience (e.g. at the Renal Association and American Society of Nephrology).  
55  
56  
57  
58  
59  
60

1  
2  
3  
4  
5  
6  
7  
8  
9  
10  
11  
12  
13  
14  
15  
16  
17  
18  
19  
20  
21  
22  
23  
24  
25  
26  
27  
28  
29  
30  
31  
32  
33  
34  
35  
36  
37  
38  
39  
40  
41  
42  
43  
44  
45  
46  
47  
48  
49  
50  
51  
52  
53  
54  
55  
56  
57  
58  
59  
60

It is expected that this study will generate a high impact manuscript. The findings of the study will be submitted for publication in an appropriate peer-review medical journal. Where possible we would seek to publish in open access journals to encourage the dissemination of the information.

For peer review only

## AUTHORS CONTRIBUTIONS

RH, RM, DL, CO'C & NH conceived and designed the study. NH, BT, SF, DL are supervising all recruitment and enrolment. JW is providing support and interpretation for the health economics, RP is supervising the statistical analysis, BS is providing laboratory/pathology supervision & analysis, CP & CO'C are providing nephrology expertise and oversight. All authors contributed substantially to the manuscript's revision. RH takes responsibility for the paper as a whole.

## FUNDING

The research was funded by the National Institute for Health Research Biomedical Research Centre (NIHR BRC) and the NIHR School of Primary Care Research. The views expressed are those of the author(s) and not necessarily those of the NHS, the NIHR or the Department of Health

## COMPETING INTERESTS

The authors declare that they have no competing interests

## FIGURE LEGENDS

**Figure 1** – Patient Flow Diagram. \* NICE criteria for diagnosis of CKD – 2 or more results at least 3 months apart in the last 12 months. \*\* (eGFR < 60 mL/min/1.73m<sup>2</sup>) or (eGFR > 60 mL/min/1.73m<sup>2</sup> AND ACR > 30) at least one result must be from V1 or V2

## REFERENCES

1. Keith DS, Nichols GA, Gullion CM, et al. Longitudinal follow-up and outcomes among a population with chronic kidney disease in a large managed care organization. *Arch Intern Med* 2004;**164**(6):659-63 doi: 10.1001/archinte.164.6.659
2. Gansevoort RT, Correa-Rotter R, Hemmelgarn BR, et al. Chronic kidney disease and cardiovascular risk: epidemiology, mechanisms, and prevention. *Lancet* 2013 doi: 10.1016/S0140-6736(13)60595-4
3. Coresh J, Selvin E, Stevens LA, et al. Prevalence of chronic kidney disease in the United States. *JAMA* 2007;**298**(17):2038-47 doi: 10.1001/jama.298.17.2038
4. Go AS, Chertow GM, Fan D, et al. Chronic kidney disease and the risks of death, cardiovascular events, and hospitalization. *The New England journal of medicine* 2004;**351**(13):1296-305 doi: 10.1056/NEJMoa041031
5. Etgen T, Chonchol M, Forstl H, et al. Chronic Kidney Disease and Cognitive Impairment: A Systematic Review and Meta-Analysis. *American journal of nephrology* 2012;**35**(5):474-82 doi: 10.1159/000338135
6. Perlman RL, Finkelstein FO, Liu L, et al. Quality of life in chronic kidney disease (CKD): a cross-sectional analysis in the Renal Research Institute-CKD study. *Am J Kidney Dis* 2005;**45**(4):658-66
7. Chin HJ, Song YR, Lee JJ, et al. Moderately decreased renal function negatively affects the health-related quality of life among the elderly Korean population: a population-based study. *Nephrology, dialysis, transplantation : official publication of the European Dialysis and Transplant Association - European Renal Association* 2008;**23**(9):2810-7 doi: 10.1093/ndt/gfn132
8. Chow FY, Briganti EM, Kerr PG, et al. Health-related quality of life in Australian adults with renal insufficiency: a population-based study. *Am J Kidney Dis* 2003;**41**(3):596-604 doi: 10.1053/ajkd.2003.50121
9. O'Callaghan CA, Shine B, Lasserson DS. Chronic kidney disease: a large-scale population-based study of the effects of introducing the CKD-EPI formula for eGFR reporting. *BMJ open* 2011;**1**(2):e000308 doi: 10.1136/bmjopen-2011-000308
10. Eknoyan G, Levey AS, Levin NW, et al. The national epidemic of chronic kidney disease. What we know and what we can do. *Postgraduate medicine* 2001;**110**(3):23-9: quiz 8
11. Tonelli M, Wiebe N, Cullerton B, et al. Chronic Kidney Disease and Mortality Risk: A Systematic Review. *Journal of the American Society of Nephrology* 2006;**17**(7):2034-47 doi: 10.1681/asn.2005101085
12. Sharma P, Blackburn RC, Parke CL, et al. Angiotensin-converting enzyme inhibitors and angiotensin receptor blockers for adults with early (stage 1 to 3) non-diabetic chronic kidney disease. *Cochrane Database Syst Rev* 2011(10):CD007751 doi: 10.1002/14651858.CD007751.pub2
13. Baigent C, Landray MJ, Reith C, et al. The effects of lowering LDL cholesterol with simvastatin plus ezetimibe in patients with chronic kidney disease (Study of Heart and Renal Protection): a randomised placebo-controlled trial. *Lancet* 2011;**377**(9784):2181-92 doi: 10.1016/S0140-6736(11)60739-3
14. Jafar TH, Stark PC, Schmid CH, et al. Progression of chronic kidney disease: the role of blood pressure control, proteinuria, and angiotensin-converting enzyme inhibition: a patient-level meta-analysis. *Ann Intern Med* 2003;**139**(4):244-52
15. Toto RD. Treatment of hypertension in chronic kidney disease. *Seminars in nephrology* 2005;**25**(6):435-9 doi: 10.1016/j.semnephrol.2005.05.016
16. KDOQI KDOQI. KDOQI Clinical Practice Guidelines for Bone Metabolism and Disease in Children With Chronic Kidney Disease. *Secondary KDOQI Clinical*

- Practice Guidelines for Bone Metabolism and Disease in Children With Chronic Kidney Disease 2005. [http://www.kidney.org/professionals/kdoqi/guidelines\\_pedbone/guide14.htm](http://www.kidney.org/professionals/kdoqi/guidelines_pedbone/guide14.htm).
17. Jones-Burton C, Mishra SI, Fink JC, et al. An in-depth review of the evidence linking dietary salt intake and progression of chronic kidney disease. *American journal of nephrology* 2006;**26**(3):268-75 doi: 10.1159/000093833
  18. Bronas UG. Cochrane review: in adults with chronic kidney disease regular exercise improves physical fitness, walking capacity, heart rate and blood pressure and some nutritional parameters. *Evidence-based nursing* 2012;**15**(3):95-6 doi: 10.1136/ebnurs-2011-100470
  19. NICE NICE. CG73 Chronic kidney disease: full guideline. Secondary CG73 Chronic kidney disease: full guideline 2008. <http://guidance.nice.org.uk/CG73/Guidance/pdf/English>.
  20. Levey AS, Bosch JP, Lewis JB, et al. A more accurate method to estimate glomerular filtration rate from serum creatinine: a new prediction equation. Modification of Diet in Renal Disease Study Group. *Ann Intern Med* 1999;**130**(6):461-70 doi: 199903160-00002 [pii]
  21. Eckardt KU, Coresh J, Devuyst O, et al. Evolving importance of kidney disease: from subspecialty to global health burden. *Lancet* 2013;**382**(9887):158-69 doi: 10.1016/S0140-6736(13)60439-0
  22. Manns B, Hemmelgarn B, Tonelli M, et al. Population based screening for chronic kidney disease: cost effectiveness study. *BMJ* 2010;**341**:c5869 doi: 10.1136/bmj.c5869
  23. de Lusignan S, Tomson C, Harris K, et al. Creatinine fluctuation has a greater effect than the formula to estimate glomerular filtration rate on the prevalence of chronic kidney disease. *Nephron. Clinical practice* 2011;**117**(3):c213-24 doi: 10.1159/000320341
  24. Rule AD, Larson TS, Bergstralh EJ, et al. Using Serum Creatinine To Estimate Glomerular Filtration Rate: Accuracy in Good Health and in Chronic Kidney Disease. *Annals of Internal Medicine* 2004;**141**(12):929-37 doi: 10.7326/0003-4819-141-12-200412210-00009
  25. Mattix HJ, Hsu CY, Shaykevich S, et al. Use of the albumin/creatinine ratio to detect microalbuminuria: implications of sex and race. *J Am Soc Nephrol* 2002;**13**(4):1034-9
  26. NICE NICE. BHS & NICE Hypertension Guideline. Secondary BHS & NICE Hypertension Guideline 2011. <http://guidance.nice.org.uk/CG127>.
  27. NICE NICE. CG66 Type 2 diabetes: full guideline. Secondary CG66 Type 2 diabetes: full guideline 2008. <http://guidance.nice.org.uk/CG66/Guidance/pdf/English>.
  28. Touze E, Rothwell PM. Heritability of ischaemic stroke in women compared with men: a genetic epidemiological study. *Lancet neurology* 2007;**6**(2):125-33 doi: 10.1016/S1474-4422(06)70683-4
  29. Dolan P, Gudex C, Kind P, et al. The time trade-off method: results from a general population study. *Health economics* 1996;**5**(2):141-54 doi: 10.1002/(SICI)1099-1050(199603)5:2<141::AID-HEC189>3.0.CO;2-N
  30. Dolan P. Modeling valuations for EuroQol health states. *Medical care* 1997;**35**(11):1095-108
  31. Rubin DB, Schenker N. Multiple imputation in health-care databases: an overview and some applications. *Statistics in medicine* 1991;**10**(4):585-98
  32. Briggs A, Clark T, Wolstenholme J, et al. Missing... presumed at random: cost-analysis of incomplete data. *Health economics* 2003;**12**(5):377-92 doi: 10.1002/hec.766

1  
2  
3  
4  
5  
6  
7  
8  
9  
10  
11  
12  
13  
14  
15  
16  
17  
18  
19  
20  
21  
22  
23  
24  
25  
26  
27  
28  
29  
30  
31  
32  
33  
34  
35  
36  
37  
38  
39  
40  
41  
42  
43  
44  
45  
46  
47  
48  
49  
50  
51  
52  
53  
54  
55  
56  
57  
58  
59  
60

33. Lattimer N. NICE DSU Technical support Document 14: Survival analysis for economic evaluations alongside clinical trials-extrapolation with patient level data. 2011. [http://www.nicedsu.org.uk/Other-TSDs\(2391674\).htm](http://www.nicedsu.org.uk/Other-TSDs(2391674).htm).

For peer review only



View Only

1  
2  
3  
4  
5  
6  
7  
8  
9  
10  
11  
12  
13  
14  
15  
16  
17  
18  
19  
20  
21  
22  
23  
24  
25  
26  
27  
28  
29  
30  
31  
32  
33  
34  
35  
36  
37  
38  
39  
40  
41  
42  
43  
44  
45  
46  
47  
48  
49  
50  
51  
52  
53  
54  
55  
56  
57  
58  
59  
60
